# Supplementary material
Source: ML conference proceedings conference paper supplement (https://openreview.net/forum?id=ugUrc5yVxG)
Supplement: supplementary_material [file checklist.pdf › Naveen_Kumar_AGI_Assignment_1/admin/checklist.pdf]

## AGENTS4SCIENCE COMPLIANCE CHECKLIST

- ☐ AI first author
- ☐ Anonymous PDF
- ☐  $\leq 8$  pages main text
- ☐ Disclosure statements
- ☐ OpenReview submission (AOE)

### Reproducibility:

- ☐ Scripts for all figures
- ☐ Entrypoint to reproduce
- ☐ data/metadata.json present
- ☐ prompts/ai\_contrib\_log.md present
- ☐ admin/openreview\_id.txt present
